# Supplementary material for: Theoretical insights into the reductive metabolism of CCl4by cytochrome P450 enzymes and the CCl4-dependent suicidal inactivation of P450
Source: Royal Society of Chemistry journal article supplement (doi:10.1039/c4dt02065k), 2014-01-01
Supplement: c4dt02065k1.pdf [file c4dt02065k1.pdf]

# Electronic Supplementary Information

## Theoretical Insights into the Reductive Metabolism of CCl<sub>4</sub> by Cytochrome

### P450 Enzymes and the CCl<sub>4</sub>-dependent Suicidal Inactivation of P450

Xiao-Xi Li,<sup>a,b</sup> Qing-Chuan Zheng,<sup>\*a</sup> Yong Wang,<sup>\*b</sup> Hong-Xing Zhang<sup>a</sup>

<sup>a</sup> State Key Laboratory of Theoretical and Computational Chemistry, Institute of Theoretical Chemistry, Jilin University, Changchun 130023, People's Republic of China

<sup>b</sup> Dalian Institute of Chemical Physics, Chinese Academy of Sciences, Dalian 116023, People's Republic of China

[zhengqc@jlu.edu.cn](mailto:zhengqc@jlu.edu.cn) [wangyong@dicp.ac.cn](mailto:wangyong@dicp.ac.cn)

**Scheme S1** Proposed reductive metabolism of  $\text{CCl}_4$  by P450.

**(A) Formation of  $\text{CCl}_3$  radical**

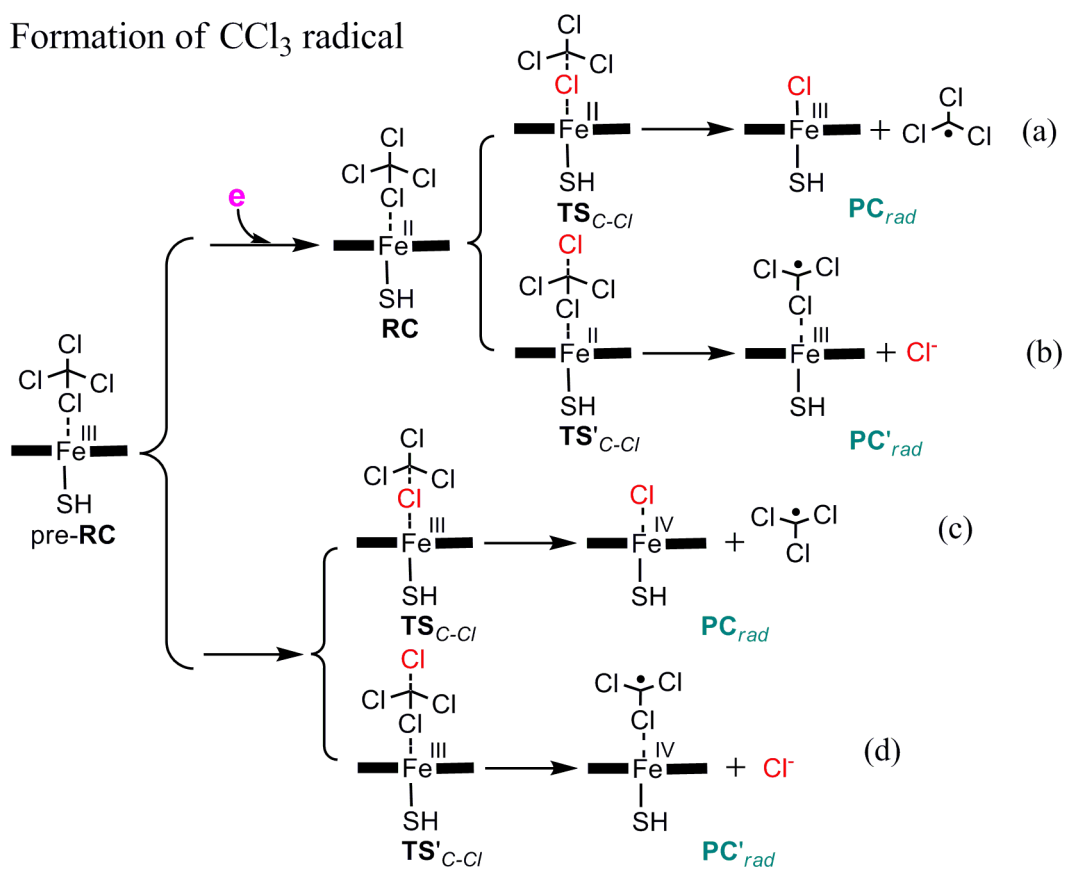

**(B) Formation of  $\text{CCl}_2$**

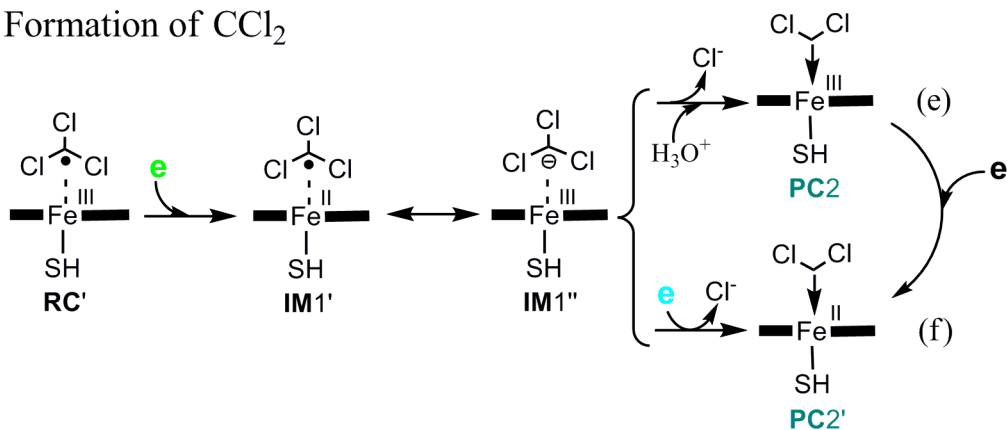

**Table S1** Calculated vertical electron affinity (VEA) values of various species appeared in the reductively metabolic process. All data were calculated at the UB3LYP/ B1 level, with dispersion corrections incorporated.

| Species                   | VEA<br>(kcal/mol) |
|---------------------------|-------------------|
| pre-RC <sup>a</sup>       | 48.3              |
| RC <sup>b</sup>           | -46.8             |
| RC <sup>c</sup>           | -36.6             |
| Ferric-Carbene<br>complex | 55.8              |

<sup>a</sup> The ferric-CCl<sub>4</sub> complex. <sup>b</sup> The ferrous-CCl<sub>4</sub> complex. <sup>c</sup> The ferric-CCl<sub>3</sub> complex.

**Table S2** Various energies (in kcal/mol) in reductive dechlorination of CCl<sub>4</sub> by P450 calculated at the UB3LYP/B2//B1 level, with ZPE and dispersion corrections incorporated.

|                                 | SPE          |      | SPE+ZPE      |      | SOLV         |      | SOLV+ZPE     |      |
|---------------------------------|--------------|------|--------------|------|--------------|------|--------------|------|
| <sup>6</sup> pre-RC             | -3390.050959 | 0.0  | -3389.758691 | 0.0  | -3390.061055 | 0.0  | -3389.768787 | 0.0  |
| <sup>4</sup> pre-RC             | -3390.046861 | 2.6  | -3389.752977 | 3.0  | -3390.059390 | 1.0  | -3389.765506 | 2.1  |
| <sup>2</sup> pre-RC             | -3390.045557 | 3.4  | -3389.750684 | 5.0  | -3390.055065 | 3.8  | -3389.760192 | 5.4  |
| <sup>5</sup> RC                 | -3390.134191 | 0.0  | -3389.844691 | 0.0  | -3390.194450 | 0.0  | -3389.904950 | 0.0  |
| <sup>3</sup> RC                 | -3390.121819 | 7.8  | -3389.830603 | 8.8  | -3390.186477 | 5.0  | -3389.895261 | 6.1  |
| <sup>1</sup> RC                 | -3390.116704 | 11.0 | -3389.825036 | 12.3 | -3390.179788 | 9.2  | -3389.888120 | 10.6 |
| <sup>5</sup> TS <sub>C-Cl</sub> | -3390.102376 | 20.0 | -3389.813355 | 19.7 | -3390.162588 | 20.0 | -3389.873567 | 19.7 |
| <sup>3</sup> TS <sub>C-Cl</sub> | -3390.113120 | 13.2 | -3389.822104 | 14.2 | -3390.173801 | 13.0 | -3389.882785 | 13.9 |
| <sup>1</sup> TS <sub>C-Cl</sub> | -3390.110607 | 14.8 | -3389.819107 | 16.1 | -3390.168599 | 16.2 | -3389.877099 | 17.5 |
| <sup>5</sup> PC <sub>rad</sub>  | -3390.118260 | 10.0 | -3389.827715 | 10.7 | -3390.187572 | 4.3  | -3389.897027 | 5.0  |
| <sup>3</sup> PC <sub>rad</sub>  | -3390.130276 | 2.5  | -3389.838110 | 4.1  | -3390.193971 | 0.3  | -3389.901805 | 2.0  |
| <sup>1</sup> PC <sub>rad</sub>  | -3390.130334 | 2.4  | -3389.838109 | 4.1  | -3390.194059 | 0.2  | -3389.901834 | 2.0  |

**Table S3** Various energies (in kcal/mol) during further reductive dechlorination of CCl<sub>3</sub> radical by P450 via a S<sub>E</sub>3 mechanism. All data were calculated at the UB3LYP/B2//B1 level, with ZPE and dispersion corrections incorporated.

|                                           | SPE          |      | SPE+ZPE      |      | SOLV         |      | SOLV+ZPE     |      |
|-------------------------------------------|--------------|------|--------------|------|--------------|------|--------------|------|
| <sup>2</sup> RC <sub>S<sub>E</sub>3</sub> | -3006.851718 | 0.0  | -3006.523468 | 0.0  | -3006.866097 | 0.0  | -3006.537847 | 0.0  |
| <sup>4</sup> RC <sub>S<sub>E</sub>3</sub> | -3006.829429 | 14.0 | -3006.503640 | 12.4 | -3006.842991 | 14.5 | -3006.517202 | 13.0 |
| <sup>6</sup> RC <sub>S<sub>E</sub>3</sub> | -3006.833787 | 11.3 | -3006.509362 | 8.9  | -3006.848908 | 10.8 | -3006.524483 | 8.4  |
| <sup>2</sup> TS <sub>S<sub>E</sub>3</sub> | -3006.848203 | 2.2  | -3006.523511 | 0.0  | -3006.861695 | 2.8  | -3006.537003 | 0.5  |
| <sup>4</sup> TS <sub>S<sub>E</sub>3</sub> | -3006.819395 | 20.3 | -3006.496652 | 16.8 | -3006.832532 | 21.1 | -3006.509789 | 17.6 |
| <sup>6</sup> TS <sub>S<sub>E</sub>3</sub> | -3006.832781 | 11.9 | -3006.511229 | 7.7  | -3006.847144 | 11.9 | -3006.525592 | 7.7  |
| <sup>2</sup> PC <sub>S<sub>E</sub>3</sub> | -3006.861312 | -6.0 | -3006.535788 | -7.7 | -3006.875242 | -5.7 | -3006.549718 | -7.4 |
| <sup>4</sup> PC <sub>S<sub>E</sub>3</sub> | -3006.847073 | 2.9  | -3006.522742 | 0.5  | -3006.862998 | 1.9  | -3006.538667 | -0.5 |
| <sup>6</sup> PC <sub>S<sub>E</sub>3</sub> | -3006.849755 | 1.2  | -3006.527011 | -2.2 | -3006.863679 | 1.5  | -3006.540935 | -1.9 |

**Table S4** Mulliken group spin densities and group charges for key moieties during further reduction of  $\text{CCl}_3$  radical by P450 via a  $\text{S}_{\text{E}3}$  mechanism. All data were computed at the UB3LYP/B1 level.

|                            | Spin densities |       |       |                |                      |      |      | Charges |       |       |                |                      |      |       |
|----------------------------|----------------|-------|-------|----------------|----------------------|------|------|---------|-------|-------|----------------|----------------------|------|-------|
|                            | Fe             | Por   | SH    | $\text{CCl}_2$ | $\text{H}_2\text{O}$ | H    | Cl   | Fe      | Por   | SH    | $\text{CCl}_2$ | $\text{H}_2\text{O}$ | H    | Cl    |
| $^2\text{RC}_{\text{SE}3}$ | 1.03           | -0.07 | 0.07  | -0.02          | 0.00                 | 0.00 | 0.00 | 0.13    | -0.32 | 0.01  | -0.33          | 0.26                 | 0.36 | -0.10 |
| $^4\text{RC}_{\text{SE}3}$ | 3.06           | 0.14  | -0.16 | -0.04          | 0.00                 | 0.00 | 0.00 | 0.29    | -0.51 | 0.02  | -0.34          | 0.26                 | 0.36 | -0.08 |
| $^6\text{RC}_{\text{SE}3}$ | 3.96           | 0.47  | 0.49  | 0.07           | 0.00                 | 0.00 | 0.02 | 0.49    | -0.53 | -0.07 | -0.35          | 0.25                 | 0.36 | -0.15 |
| $^2\text{TS}_{\text{SE}3}$ | 1.02           | -0.07 | 0.06  | -0.02          | 0.00                 | 0.00 | 0.00 | 0.12    | -0.30 | 0.02  | -0.06          | 0.20                 | 0.32 | -0.30 |
| $^4\text{TS}_{\text{SE}3}$ | 3.31           | 0.11  | -0.43 | 0.00           | 0.00                 | 0.00 | 0.01 | 0.34    | -0.49 | 0.01  | -0.08          | 0.21                 | 0.32 | -0.30 |
| $^6\text{TS}_{\text{SE}3}$ | 3.95           | 0.50  | 0.50  | 0.03           | 0.00                 | 0.00 | 0.02 | 0.50    | -0.52 | -0.06 | -0.13          | 0.21                 | 0.32 | -0.32 |
| $^2\text{PC}_{\text{SE}3}$ | 0.96           | -0.07 | 0.13  | -0.03          | 0.00                 | 0.00 | 0.00 | 0.17    | -0.23 | 0.00  | 0.08           | 0.08                 | 0.20 | -0.30 |
| $^4\text{PC}_{\text{SE}3}$ | 2.44           | 0.07  | 0.48  | 0.00           | 0.01                 | 0.00 | 0.00 | 0.30    | -0.20 | -0.07 | 0.00           | 0.10                 | 0.21 | -0.33 |
| $^6\text{PC}_{\text{SE}3}$ | 3.92           | 0.61  | 0.50  | -0.03          | 0.00                 | 0.00 | 0.00 | 0.56    | -0.46 | -0.06 | -0.01          | 0.10                 | 0.21 | -0.34 |

**Fig. S1** Energy profiles (in kcal/mol) for the direct reduction of  $\cdot\text{CCl}_3$  without the assistance of proton calculated at the UB3LYP/B2//B1. All energy data include ZPE, solvation and dispersion corrections.

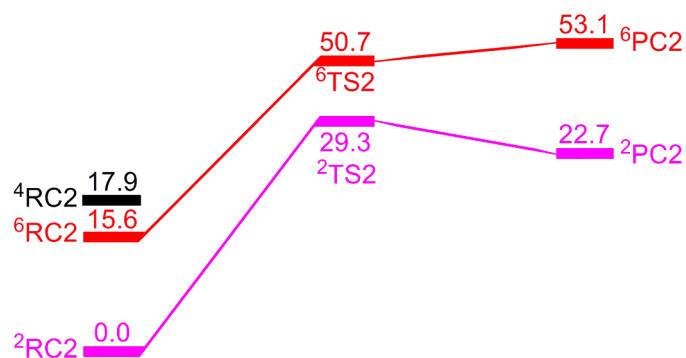

## Cartesian Coordinates of the Key Reaction Species

| Formation of CCl <sub>3</sub> radical |              |              |              | <sup>4</sup> pre-RC |              |              |              |
|---------------------------------------|--------------|--------------|--------------|---------------------|--------------|--------------|--------------|
| <sup>6</sup> pre-RC                   |              |              |              | 26                  | 0.472581000  | -0.641212000 | 0.144575000  |
| 26                                    | 0.431032000  | -0.458204000 | 0.012475000  | 7                   | 1.066190000  | 0.354993000  | 1.787657000  |
| 7                                     | 1.062169000  | 0.400818000  | 1.804726000  | 6                   | 2.325773000  | 0.851958000  | 2.033583000  |
| 6                                     | 2.335363000  | 0.840718000  | 2.074583000  | 6                   | 2.323073000  | 1.664985000  | 3.220068000  |
| 6                                     | 2.335348000  | 1.629300000  | 3.282355000  | 1                   | 3.195197000  | 2.164766000  | 3.621187000  |
| 1                                     | 3.212757000  | 2.090708000  | 3.717104000  | 6                   | 1.049523000  | 1.648781000  | 3.703795000  |
| 6                                     | 1.051240000  | 1.646205000  | 3.743726000  | 1                   | 0.651728000  | 2.136305000  | 4.584385000  |
| 1                                     | 0.661696000  | 2.127447000  | 4.631680000  | 6                   | 0.274046000  | 0.838893000  | 2.802563000  |
| 6                                     | 0.261608000  | 0.876574000  | 2.813413000  | 6                   | -1.083400000 | 0.602931000  | 2.943345000  |
| 6                                     | -1.106758000 | 0.645070000  | 2.928194000  | 1                   | -1.585747000 | 1.040788000  | 3.799308000  |
| 1                                     | -1.607925000 | 1.077463000  | 3.788557000  | 7                   | -1.381867000 | -0.744601000 | 0.915610000  |
| 7                                     | -1.438539000 | -0.703988000 | 0.905332000  | 6                   | -1.849085000 | -0.132421000 | 2.053731000  |
| 6                                     | -1.891743000 | -0.094449000 | 2.046889000  | 6                   | -3.267478000 | -0.333443000 | 2.187811000  |
| 6                                     | -3.307075000 | -0.331098000 | 2.200757000  | 1                   | -3.864647000 | 0.047796000  | 3.006031000  |
| 1                                     | -3.907562000 | 0.036974000  | 3.022828000  | 6                   | -3.664487000 | -1.059243000 | 1.105224000  |
| 6                                     | -3.699950000 | -1.084859000 | 1.133420000  | 1                   | -4.656148000 | -1.407653000 | 0.847416000  |
| 1                                     | -4.687123000 | -1.465216000 | 0.904223000  | 6                   | -2.484430000 | -1.314184000 | 0.323521000  |
| 6                                     | -2.523101000 | -1.318829000 | 0.332389000  | 6                   | -2.470477000 | -2.082676000 | -0.827342000 |
| 6                                     | -2.485064000 | -2.111722000 | -0.810833000 | 1                   | -3.415946000 | -2.478503000 | -1.182174000 |
| 1                                     | -3.424926000 | -2.543311000 | -1.140382000 | 7                   | -0.046446000 | -2.032646000 | -1.205304000 |
| 7                                     | -0.070710000 | -2.032295000 | -1.255993000 | 6                   | -1.324007000 | -2.436829000 | -1.517742000 |
| 6                                     | -1.345416000 | -2.463645000 | -1.529257000 | 6                   | -1.305283000 | -3.347490000 | -2.629550000 |
| 6                                     | -1.320808000 | -3.399945000 | -2.625024000 | 1                   | -2.186064000 | -3.807083000 | -3.058801000 |
| 1                                     | -2.193394000 | -3.893047000 | -3.033907000 | 6                   | 0.000986000  | -3.503725000 | -2.987080000 |
| 6                                     | -0.015058000 | -3.536134000 | -3.000090000 | 1                   | 0.420167000  | -4.113843000 | -3.776737000 |
| 1                                     | 0.398994000  | -4.160014000 | -3.781851000 | 6                   | 0.774502000  | -2.674054000 | -2.103254000 |
| 6                                     | 0.758958000  | -2.674577000 | -2.140626000 | 6                   | 2.151173000  | -2.535865000 | -2.175682000 |
| 6                                     | 2.142538000  | -2.522929000 | -2.199907000 | 1                   | 2.674601000  | -3.096410000 | -2.942940000 |
| 1                                     | 2.666876000  | -3.091389000 | -2.961754000 | 7                   | 2.404813000  | -0.947974000 | -0.323851000 |
| 7                                     | 2.432025000  | -0.943216000 | -0.344827000 | 6                   | 2.902811000  | -1.716947000 | -1.349586000 |
| 6                                     | 2.916914000  | -1.718581000 | -1.367809000 | 6                   | 4.325824000  | -1.538369000 | -1.467861000 |
| 6                                     | 4.350836000  | -1.576831000 | -1.453488000 | 1                   | 4.946922000  | -2.041250000 | -2.197785000 |
| 1                                     | 4.978692000  | -2.087296000 | -2.172588000 | 6                   | 4.689455000  | -0.640547000 | -0.510142000 |
| 6                                     | 4.721319000  | -0.704440000 | -0.472345000 | 1                   | 5.673567000  | -0.251880000 | -0.282666000 |
| 1                                     | 5.715040000  | -0.356283000 | -0.221215000 | 6                   | 3.490277000  | -0.284060000 | 0.200347000  |
| 6                                     | 3.515862000  | -0.318138000 | 0.220753000  | 6                   | 3.458067000  | 0.575651000  | 1.285412000  |
| 6                                     | 3.468497000  | 0.524880000  | 1.328534000  | 1                   | 4.391469000  | 1.033919000  | 1.594351000  |
| 1                                     | 4.411309000  | 0.942367000  | 1.667995000  | 16                  | 0.135673000  | 1.269884000  | -1.254020000 |
| 16                                    | 0.134498000  | 1.398852000  | -1.361879000 | 1                   | 0.643932000  | 0.630844000  | -2.327712000 |
| 1                                     | 0.595336000  | 0.735548000  | -2.443187000 | 6                   | -0.126056000 | -4.389146000 | 2.162692000  |
| 6                                     | -0.059300000 | -4.324086000 | 2.122444000  | 17                  | 0.310829000  | -5.741954000 | 3.268172000  |
| 17                                    | 0.479589000  | -5.614425000 | 3.259434000  | 17                  | 1.109660000  | -3.096553000 | 2.289356000  |
| 17                                    | 1.106943000  | -2.969028000 | 2.159782000  | 17                  | -0.191342000 | -4.995693000 | 0.476892000  |
| 17                                    | -0.149165000 | -4.997012000 | 0.461664000  | 17                  | -1.728115000 | -3.732404000 | 2.628991000  |
| 17                                    | -1.680008000 | -3.734100000 | 2.619420000  |                     |              |              |              |

<sup>2</sup>pre-RC

|                 |              |              |              |                 |              |              |              |
|-----------------|--------------|--------------|--------------|-----------------|--------------|--------------|--------------|
| 26              | 0.483280000  | -0.701374000 | 0.188749000  | 6               | 2.346193000  | 1.574351000  | 3.342388000  |
| 7               | 1.060289000  | 0.345120000  | 1.794363000  | 1               | 3.229315000  | 1.997817000  | 3.806758000  |
| 6               | 2.308468000  | 0.881733000  | 2.008455000  | 6               | 1.053469000  | 1.624767000  | 3.777809000  |
| 6               | 2.312553000  | 1.696780000  | 3.196603000  | 1               | 0.662654000  | 2.099372000  | 4.670529000  |
| 1               | 3.180083000  | 2.220853000  | 3.576499000  | 6               | 0.260689000  | 0.892984000  | 2.808220000  |
| 6               | 1.053826000  | 1.643857000  | 3.712162000  | 6               | -1.116479000 | 0.670859000  | 2.904519000  |
| 1               | 0.663802000  | 2.119794000  | 4.602536000  | 1               | -1.618185000 | 1.097404000  | 3.769809000  |
| 6               | 0.279524000  | 0.813755000  | 2.825836000  | 7               | -1.469680000 | -0.676017000 | 0.885153000  |
| 6               | -1.073470000 | 0.560811000  | 2.977783000  | 6               | -1.910841000 | -0.074122000 | 2.025886000  |
| 1               | -1.572771000 | 0.985271000  | 3.842631000  | 6               | -3.322725000 | -0.347640000 | 2.216349000  |
| 7               | -1.373569000 | -0.743585000 | 0.925750000  | 1               | -3.919357000 | 0.008710000  | 3.048224000  |
| 6               | -1.844221000 | -0.152616000 | 2.074674000  | 6               | -3.712438000 | -1.129016000 | 1.166752000  |
| 6               | -3.266919000 | -0.338791000 | 2.194974000  | 1               | -4.692688000 | -1.544972000 | 0.964534000  |
| 1               | -3.865062000 | 0.027166000  | 3.019464000  | 6               | -2.535346000 | -1.332590000 | 0.344150000  |
| 6               | -3.664721000 | -1.027460000 | 1.089528000  | 6               | -2.489447000 | -2.147661000 | -0.790589000 |
| 1               | -4.658953000 | -1.355951000 | 0.815399000  | 1               | -3.423397000 | -2.616146000 | -1.091062000 |
| 6               | -2.479982000 | -1.278825000 | 0.310174000  | 7               | -0.094863000 | -2.013927000 | -1.297565000 |
| 6               | -2.462417000 | -2.033520000 | -0.850434000 | 6               | -1.352289000 | -2.488104000 | -1.529341000 |
| 1               | -3.411437000 | -2.406676000 | -1.221318000 | 6               | -1.323168000 | -3.465056000 | -2.600006000 |
| 7               | -0.034413000 | -2.045802000 | -1.192114000 | 1               | -2.186496000 | -3.999469000 | -2.979340000 |
| 6               | -1.315965000 | -2.413867000 | -1.528084000 | 6               | -0.019128000 | -3.573844000 | -2.992028000 |
| 6               | -1.304372000 | -3.329650000 | -2.638838000 | 1               | 0.401370000  | -4.213476000 | -3.759565000 |
| 1               | -2.190331000 | -3.767471000 | -3.080354000 | 6               | 0.739996000  | -2.658601000 | -2.161622000 |
| 6               | 0.001692000  | -3.522453000 | -2.974653000 | 6               | 2.128910000  | -2.494438000 | -2.216945000 |
| 1               | 0.417493000  | -4.145596000 | -3.755898000 | 1               | 2.655860000  | -3.072351000 | -2.972553000 |
| 6               | 0.781493000  | -2.706317000 | -2.081520000 | 7               | 2.443783000  | -0.926857000 | -0.356939000 |
| 6               | 2.159283000  | -2.577883000 | -2.145822000 | 6               | 2.915959000  | -1.700267000 | -1.377014000 |
| 1               | 2.684614000  | -3.148562000 | -2.904701000 | 6               | 4.362718000  | -1.605351000 | -1.440710000 |
| 7               | 2.397731000  | -0.953568000 | -0.327570000 | 1               | 4.989670000  | -2.123069000 | -2.157594000 |
| 6               | 2.906727000  | -1.735785000 | -1.339414000 | 6               | 4.742799000  | -0.765547000 | -0.434312000 |
| 6               | 4.325347000  | -1.530103000 | -1.475217000 | 1               | 5.744420000  | -0.456678000 | -0.158161000 |
| 1               | 4.952144000  | -2.039995000 | -2.195361000 | 6               | 3.527051000  | -0.354076000 | 0.242649000  |
| 6               | 4.674533000  | -0.596129000 | -0.548157000 | 6               | 3.478068000  | 0.467980000  | 1.373183000  |
| 1               | 5.651367000  | -0.179000000 | -0.339847000 | 1               | 4.427931000  | 0.848466000  | 1.740863000  |
| 6               | 3.471782000  | -0.248478000 | 0.164407000  | 16              | 0.114375000  | 1.622299000  | -1.558015000 |
| 6               | 3.430416000  | 0.628264000  | 1.236549000  | 1               | 0.570718000  | 0.923824000  | -2.620296000 |
| 1               | 4.357349000  | 1.114353000  | 1.523116000  | 6               | -0.030559000 | -4.232039000 | 2.084781000  |
| 16              | 0.159150000  | 1.064217000  | -1.111580000 | 17              | 0.605986000  | -5.481555000 | 3.255934000  |
| 1               | 0.778493000  | 0.561048000  | -2.200569000 | 17              | 1.058438000  | -2.839467000 | 2.037604000  |
| 6               | -0.151296000 | -4.386505000 | 2.135776000  | 17              | -0.150611000 | -4.980867000 | 0.458418000  |
| 17              | 0.285963000  | -5.730846000 | 3.251996000  | 17              | -1.663385000 | -3.718265000 | 2.630064000  |
| 17              | 1.091081000  | -3.095566000 | 2.255558000  | <sup>3</sup> RC |              |              |              |
| 17              | -0.217010000 | -5.004225000 | 0.455672000  | 26              | 0.413075000  | -0.669251000 | 0.151946000  |
| 17              | -1.749762000 | -3.722590000 | 2.598595000  | 7               | 1.008220000  | 0.413165000  | 1.737069000  |
| <sup>5</sup> RC |              |              |              | 6               | 2.293892000  | 0.756200000  | 2.071719000  |
| 26              | 0.398948000  | -0.283588000 | -0.116636000 | 6               | 2.303185000  | 1.604019000  | 3.246270000  |
| 7               | 1.064489000  | 0.422465000  | 1.810416000  | 1               | 3.197731000  | 2.010196000  | 3.703178000  |
| 6               | 2.339086000  | 0.807592000  | 2.111098000  | 6               | 1.007358000  | 1.744967000  | 3.633982000  |







|                                |              |              |              |                                |              |              |              |             |
|--------------------------------|--------------|--------------|--------------|--------------------------------|--------------|--------------|--------------|-------------|
| 1                              | -3.414556000 | -2.674507000 | -1.447858000 | 6                              | -1.261446000 | -3.130154000 | -3.188534000 |             |
| 7                              | -0.083137000 | -2.046183000 | -1.488249000 | 1                              | -2.118661000 | -3.597369000 | -3.657387000 |             |
| 6                              | -1.333153000 | -2.488232000 | -1.817877000 | 6                              | 0.020483000  | -3.044825000 | -3.642453000 |             |
| 6                              | -1.297832000 | -3.216463000 | -3.066669000 | 1                              | 0.442750000  | -3.430601000 | -4.562090000 |             |
| 1                              | -2.161343000 | -3.669261000 | -3.539140000 | 6                              | 0.768961000  | -2.330957000 | -2.636470000 |             |
| 6                              | -0.003976000 | -3.197074000 | -3.490753000 | 6                              | 2.131407000  | -2.078784000 | -2.711321000 |             |
| 1                              | 0.425298000  | -3.633952000 | -4.384381000 | 1                              | 2.655148000  | -2.422645000 | -3.597944000 |             |
| 6                              | 0.745716000  | -2.465390000 | -2.493140000 | 7                              | 2.401197000  | -0.965456000 | -0.544624000 |             |
| 6                              | 2.118192000  | -2.257580000 | -2.544079000 | 6                              | 2.884596000  | -1.457584000 | -1.725087000 |             |
| 1                              | 2.648134000  | -2.653354000 | -3.406103000 | 6                              | 4.314362000  | -1.272802000 | -1.790816000 |             |
| 7                              | 2.388107000  | -1.062842000 | -0.420821000 | 1                              | 4.934467000  | -1.578548000 | -2.624399000 |             |
| 6                              | 2.877242000  | -1.617164000 | -1.572735000 | 6                              | 4.685067000  | -0.675043000 | -0.623768000 |             |
| 6                              | 4.315189000  | -1.471895000 | -1.628692000 | 1                              | 5.674348000  | -0.381235000 | -0.295126000 |             |
| 1                              | 4.937960000  | -1.830924000 | -2.439236000 | 6                              | 3.478999000  | -0.487435000 | 0.146174000  |             |
| 6                              | 4.684970000  | -0.824201000 | -0.489099000 | 6                              | 3.433010000  | 0.114551000  | 1.396570000  |             |
| 1                              | 5.676812000  | -0.533741000 | -0.163773000 | 1                              | 4.372080000  | 0.448029000  | 1.827320000  |             |
| 6                              | 3.470383000  | -0.569541000 | 0.252741000  | 16                             | 0.095670000  | 1.252426000  | -1.118402000 |             |
| 6                              | 3.415028000  | 0.102910000  | 1.468548000  | 1                              | 1.205906000  | 1.758545000  | -0.543373000 |             |
| 1                              | 4.355392000  | 0.436301000  | 1.898718000  | 6                              | -0.103612000 | -3.616330000 | 3.768810000  |             |
| 16                             | 0.212226000  | 0.988180000  | -1.120758000 | 17                             | 0.375861000  | -5.248081000 | 4.234453000  |             |
| 1                              | 1.305568000  | 1.602065000  | -0.621414000 | 17                             | 0.964292000  | -3.291966000 | 1.171534000  |             |
| 6                              | 0.156827000  | -3.601746000 | 3.085235000  | 17                             | -1.834130000 | -3.416861000 | 3.557459000  |             |
| 17                             | 0.675747000  | -5.301514000 | 3.472722000  | 17                             | 0.656906000  | -2.353542000 | 4.722491000  |             |
| 17                             | 0.834170000  | -3.125401000 | 1.224623000  |                                |              |              |              |             |
| 17                             | -1.629385000 | -3.486147000 | 3.094869000  | <sup>3</sup> PC <sub>rad</sub> | 26           | 0.557641000  | -0.828592000 | 0.270655000 |
| 17                             | 0.868549000  | -2.457388000 | 4.264916000  | 7                              | 1.063809000  | 0.482510000  | 1.715797000  |             |
|                                |              |              |              | 6                              | 2.297322000  | 1.012066000  | 1.970251000  |             |
| <sup>5</sup> PC <sub>rad</sub> |              |              |              | 6                              | 2.231059000  | 1.919714000  | 3.092367000  |             |
| 26                             | 0.473987000  | -0.961983000 | 0.056913000  | 1                              | 3.077187000  | 2.465871000  | 3.491377000  |             |
| 7                              | 1.009281000  | -0.005513000 | 1.746950000  | 6                              | 0.936204000  | 1.920540000  | 3.513871000  |             |
| 6                              | 2.276454000  | 0.341630000  | 2.129502000  | 1                              | 0.488001000  | 2.469257000  | 4.333294000  |             |
| 6                              | 2.240610000  | 1.026633000  | 3.398495000  | 6                              | 0.216810000  | 1.017649000  | 2.643931000  |             |
| 1                              | 3.114656000  | 1.398429000  | 3.918800000  | 6                              | -1.140856000 | 0.748207000  | 2.756023000  |             |
| 6                              | 0.931120000  | 1.097312000  | 3.768439000  | 1                              | -1.682566000 | 1.250926000  | 3.551917000  |             |
| 1                              | 0.499368000  | 1.532099000  | 4.661202000  | 7                              | -1.365224000 | -0.817818000 | 0.883957000  |             |
| 6                              | 0.172446000  | 0.441540000  | 2.732292000  | 6                              | -1.866707000 | -0.101447000 | 1.932636000  |             |
| 6                              | -1.202932000 | 0.264784000  | 2.767277000  | 6                              | -3.287493000 | -0.336303000 | 2.064560000  |             |
| 1                              | -1.738320000 | 0.670272000  | 3.619688000  | 1                              | -3.914878000 | 0.113126000  | 2.824698000  |             |
| 7                              | -1.434905000 | -1.026039000 | 0.697276000  | 6                              | -3.633289000 | -1.199239000 | 1.070362000  |             |
| 6                              | -1.939077000 | -0.432052000 | 1.821389000  | 1                              | -4.604773000 | -1.618224000 | 0.838676000  |             |
| 6                              | -3.359610000 | -0.665829000 | 1.912700000  | 6                              | -2.420558000 | -1.494220000 | 0.342554000  |             |
| 1                              | -3.988831000 | -0.304397000 | 2.716361000  | 6                              | -2.349696000 | -2.357925000 | -0.741068000 |             |
| 6                              | -3.701462000 | -1.419938000 | 0.831315000  | 1                              | -3.268484000 | -2.838451000 | -1.062633000 |             |
| 1                              | -4.674493000 | -1.803353000 | 0.550143000  | 7                              | 0.054807000  | -2.173583000 | -1.147611000 |             |
| 6                              | -2.491303000 | -1.630261000 | 0.073718000  | 6                              | -1.184329000 | -2.675659000 | -1.423836000 |             |
| 6                              | -2.434855000 | -2.310244000 | -1.134433000 | 6                              | -1.115156000 | -3.605218000 | -2.527797000 |             |
| 1                              | -3.357416000 | -2.741252000 | -1.510724000 | 1                              | -1.964715000 | -4.142033000 | -2.931697000 |             |
| 7                              | -0.052305000 | -1.980787000 | -1.600285000 | 6                              | 0.190512000  | -3.656556000 | -2.908950000 |             |
| 6                              | -1.293846000 | -2.458874000 | -1.911662000 |                                |              |              |              |             |

|    |              |              |              |    |              |              |              |
|----|--------------|--------------|--------------|----|--------------|--------------|--------------|
| 1  | 0.646629000  | -4.241810000 | -3.698149000 | 1  | 2.644563000  | -2.387098000 | -3.599205000 |
| 6  | 0.910479000  | -2.750966000 | -2.041353000 | 7  | 2.404054000  | -0.961139000 | -0.531377000 |
| 6  | 2.274166000  | -2.508348000 | -2.132976000 | 6  | 2.878681000  | -1.439537000 | -1.719411000 |
| 1  | 2.824049000  | -3.047489000 | -2.898885000 | 6  | 4.310614000  | -1.255597000 | -1.793988000 |
| 7  | 2.484155000  | -0.870291000 | -0.320441000 | 1  | 4.924119000  | -1.553516000 | -2.635619000 |
| 6  | 2.994449000  | -1.629741000 | -1.334412000 | 6  | 4.690207000  | -0.670528000 | -0.624226000 |
| 6  | 4.414938000  | -1.396587000 | -1.466264000 | 1  | 5.681771000  | -0.380255000 | -0.298751000 |
| 1  | 5.050477000  | -1.882446000 | -2.196660000 | 6  | 3.486824000  | -0.490625000 | 0.155001000  |
| 6  | 4.750466000  | -0.483094000 | -0.513745000 | 6  | 3.444481000  | 0.101815000  | 1.410413000  |
| 1  | 5.721212000  | -0.057101000 | -0.291015000 | 1  | 4.384035000  | 0.433098000  | 1.842631000  |
| 6  | 3.534058000  | -0.166652000 | 0.198711000  | 16 | 0.109423000  | 1.028136000  | -1.003668000 |
| 6  | 3.455983000  | 0.723153000  | 1.261789000  | 1  | 1.230486000  | 1.621077000  | -0.543870000 |
| 1  | 4.371792000  | 1.217445000  | 1.572193000  | 6  | -0.111733000 | -3.568105000 | 3.819058000  |
| 16 | 0.114376000  | 0.904602000  | -1.184271000 | 17 | 0.411864000  | -5.206854000 | 4.164932000  |
| 1  | 1.237190000  | 1.595310000  | -0.897382000 | 17 | 0.892390000  | -3.105431000 | 1.107756000  |
| 6  | -0.797416000 | -4.899910000 | 2.070736000  | 17 | -1.833146000 | -3.370030000 | 3.631881000  |
| 17 | -0.830847000 | -5.571117000 | 0.461806000  | 17 | 0.688779000  | -2.329358000 | 4.748623000  |
| 17 | 1.045304000  | -2.619628000 | 1.793008000  |    |              |              |              |
| 17 | -2.274116000 | -4.136978000 | 2.596164000  |    |              |              |              |
| 17 | -0.015746000 | -5.907441000 | 3.276192000  |    |              |              |              |

<sup>1</sup>PC<sub>rad</sub>

|    |              |              |              |
|----|--------------|--------------|--------------|
| 26 | 0.479056000  | -0.980528000 | 0.063497000  |
| 7  | 1.023333000  | -0.017092000 | 1.746200000  |
| 6  | 2.285559000  | 0.328745000  | 2.140175000  |
| 6  | 2.242622000  | 1.016353000  | 3.410169000  |
| 1  | 3.113358000  | 1.387310000  | 3.936993000  |
| 6  | 0.930474000  | 1.091499000  | 3.766302000  |
| 1  | 0.490294000  | 1.529623000  | 4.653694000  |
| 6  | 0.179591000  | 0.435259000  | 2.720529000  |
| 6  | -1.197551000 | 0.262881000  | 2.744880000  |
| 1  | -1.734817000 | 0.672686000  | 3.594791000  |
| 7  | -1.439840000 | -1.031978000 | 0.678776000  |
| 6  | -1.938325000 | -0.433512000 | 1.800282000  |
| 6  | -3.361061000 | -0.667665000 | 1.901681000  |
| 1  | -3.986156000 | -0.301724000 | 2.706979000  |
| 6  | -3.708011000 | -1.427684000 | 0.826917000  |
| 1  | -4.681975000 | -1.813622000 | 0.551736000  |
| 6  | -2.498261000 | -1.639439000 | 0.065097000  |
| 6  | -2.441981000 | -2.324056000 | -1.140933000 |
| 1  | -3.363604000 | -2.758777000 | -1.516284000 |
| 7  | -0.064845000 | -1.979354000 | -1.601349000 |
| 6  | -1.300468000 | -2.464422000 | -1.919085000 |
| 6  | -1.263426000 | -3.128026000 | -3.202628000 |
| 1  | -2.116910000 | -3.598498000 | -3.675443000 |
| 6  | 0.017344000  | -3.028241000 | -3.653394000 |
| 1  | 0.445128000  | -3.403370000 | -4.575218000 |
| 6  | 0.758657000  | -2.313984000 | -2.637803000 |
| 6  | 2.120630000  | -2.052926000 | -2.708366000 |

**Formation of CCl<sub>2</sub> via a S<sub>E</sub>3 mechanism**

<sup>6</sup>RC<sub>S<sub>E</sub>3</sub>

|    |              |              |              |
|----|--------------|--------------|--------------|
| 26 | 0.085791000  | 0.006168000  | -0.711004000 |
| 7  | 1.514165000  | 1.484621000  | -0.503122000 |
| 6  | 2.866889000  | 1.283124000  | -0.538777000 |
| 6  | 3.540478000  | 2.562625000  | -0.498623000 |
| 1  | 4.614467000  | 2.697242000  | -0.509992000 |
| 6  | 2.569270000  | 3.519860000  | -0.436852000 |
| 1  | 2.689460000  | 4.594746000  | -0.392756000 |
| 6  | 1.297729000  | 2.828377000  | -0.451289000 |
| 6  | 0.037545000  | 3.440131000  | -0.471031000 |
| 1  | 0.025796000  | 4.525557000  | -0.447295000 |
| 7  | -1.401283000 | 1.450069000  | -0.597408000 |
| 6  | -1.200511000 | 2.807447000  | -0.567039000 |
| 6  | -2.473832000 | 3.478525000  | -0.703592000 |
| 1  | -2.608807000 | 4.552657000  | -0.708050000 |
| 6  | -3.425616000 | 2.508938000  | -0.842398000 |
| 1  | -4.492516000 | 2.631307000  | -0.979820000 |
| 6  | -2.736571000 | 1.237561000  | -0.786600000 |
| 6  | -3.354134000 | -0.028405000 | -0.833960000 |
| 1  | -4.426766000 | -0.038626000 | -1.003158000 |
| 7  | -1.377834000 | -1.468759000 | -0.573065000 |
| 6  | -2.716253000 | -1.283247000 | -0.758759000 |
| 6  | -3.383994000 | -2.567351000 | -0.790061000 |
| 1  | -4.449305000 | -2.710367000 | -0.919738000 |
| 6  | -2.414768000 | -3.517638000 | -0.640996000 |
| 1  | -2.530731000 | -4.593916000 | -0.626779000 |
| 6  | -1.152562000 | -2.821059000 | -0.522422000 |
| 6  | 0.098241000  | -3.428986000 | -0.430809000 |
| 1  | 0.106874000  | -4.513974000 | -0.389259000 |

|                                |              |              |              |                                |              |              |              |
|--------------------------------|--------------|--------------|--------------|--------------------------------|--------------|--------------|--------------|
| 7                              | 1.541138000  | -1.447395000 | -0.504839000 | 7                              | -1.322641000 | 1.632951000  | -0.485276000 |
| 6                              | 1.347916000  | -2.794711000 | -0.429499000 | 6                              | -0.939062000 | 2.942390000  | -0.468049000 |
| 6                              | 2.631147000  | -3.462045000 | -0.402851000 | 6                              | -2.115550000 | 3.785140000  | -0.506466000 |
| 1                              | 2.771012000  | -4.533684000 | -0.340124000 | 1                              | -2.098929000 | 4.867477000  | -0.496637000 |
| 6                              | 3.585679000  | -2.487753000 | -0.475422000 | 6                              | -3.196506000 | 2.955223000  | -0.565261000 |
| 1                              | 4.661923000  | -2.603487000 | -0.479100000 | 1                              | -4.245129000 | 3.220586000  | -0.608106000 |
| 6                              | 2.889960000  | -1.221869000 | -0.534617000 | 6                              | -2.689959000 | 1.599837000  | -0.551907000 |
| 6                              | 3.496971000  | 0.037001000  | -0.571590000 | 6                              | -3.481552000 | 0.446748000  | -0.577724000 |
| 1                              | 4.582625000  | 0.046964000  | -0.591822000 | 1                              | -4.553854000 | 0.606018000  | -0.645043000 |
| 16                             | 0.145634000  | -0.025829000 | -3.106661000 | 16                             | -0.085934000 | -0.030243000 | -2.797364000 |
| 1                              | 0.302333000  | -1.364772000 | -3.139870000 | 1                              | -0.831138000 | 1.080970000  | -2.964109000 |
| 6                              | 0.285625000  | 0.005602000  | 1.794563000  | 6                              | -0.252383000 | 0.029820000  | 1.734092000  |
| 17                             | -0.595071000 | -1.541305000 | 2.661933000  | 17                             | 0.793259000  | 1.405280000  | 2.558035000  |
| 17                             | -0.575886000 | 1.575891000  | 2.627544000  | 17                             | 0.363917000  | -1.604323000 | 2.529353000  |
| 17                             | 1.937124000  | 0.002072000  | 2.471857000  | 17                             | -1.890372000 | 0.261507000  | 2.402474000  |
| 8                              | -2.956958000 | 0.022605000  | 2.002525000  | 8                              | 3.002985000  | -0.442391000 | 1.942151000  |
| 1                              | -2.325679000 | 0.802632000  | 2.162252000  | 1                              | 2.271865000  | -1.121549000 | 2.087786000  |
| 1                              | -3.186347000 | 0.008984000  | 1.014054000  | 1                              | 3.233995000  | -0.458954000 | 0.934543000  |
| 1                              | -2.332775000 | -0.758916000 | 2.186071000  | 1                              | 2.501143000  | 0.414725000  | 2.110314000  |
| <sup>4</sup> RC <sub>SE3</sub> |              |              |              | <sup>2</sup> RC <sub>SE3</sub> |              |              |              |
| 26                             | -0.093415000 | 0.018509000  | -0.484890000 | 26                             | 0.096288000  | -0.000229000 | -0.517774000 |
| 7                              | -1.746215000 | -1.264831000 | -0.423650000 | 7                              | 1.484871000  | 1.447205000  | -0.461856000 |
| 6                              | -3.050416000 | -0.880504000 | -0.518512000 | 6                              | 2.838223000  | 1.261542000  | -0.554055000 |
| 6                              | -3.894879000 | -2.057219000 | -0.565706000 | 6                              | 3.519538000  | 2.534567000  | -0.533386000 |
| 1                              | -4.975174000 | -2.045085000 | -0.636299000 | 1                              | 4.593516000  | 2.656511000  | -0.589664000 |
| 6                              | -3.063851000 | -3.138979000 | -0.515474000 | 6                              | 2.557100000  | 3.490444000  | -0.424415000 |
| 1                              | -3.327806000 | -4.188640000 | -0.539869000 | 1                              | 2.669580000  | 4.565959000  | -0.381085000 |
| 6                              | -1.711171000 | -2.620999000 | -0.447506000 | 6                              | 1.290664000  | 2.796957000  | -0.401176000 |
| 6                              | -0.535187000 | -3.383008000 | -0.497047000 | 6                              | 0.050728000  | 3.428276000  | -0.409569000 |
| 1                              | -0.659459000 | -4.461411000 | -0.531963000 | 1                              | 0.040787000  | 4.512964000  | -0.379760000 |
| 7                              | 1.173278000  | -1.599303000 | -0.566305000 | 7                              | -1.338443000 | 1.416850000  | -0.585576000 |
| 6                              | 0.773124000  | -2.914992000 | -0.592389000 | 6                              | -1.164145000 | 2.780422000  | -0.541269000 |
| 6                              | 1.933007000  | -3.758353000 | -0.793657000 | 6                              | -2.427808000 | 3.451517000  | -0.725772000 |
| 1                              | 1.905205000  | -4.839253000 | -0.847568000 | 1                              | -2.557516000 | 4.526090000  | -0.725442000 |
| 6                              | 3.010947000  | -2.934259000 | -0.924042000 | 6                              | -3.362098000 | 2.481099000  | -0.923080000 |
| 1                              | 4.044744000  | -3.201362000 | -1.103134000 | 1                              | -4.422284000 | 2.587900000  | -1.114069000 |
| 6                              | 2.515761000  | -1.577292000 | -0.800917000 | 6                              | -2.663880000 | 1.217869000  | -0.846994000 |
| 6                              | 3.324700000  | -0.419281000 | -0.836137000 | 6                              | -3.290985000 | -0.031705000 | -0.933422000 |
| 1                              | 4.374456000  | -0.573604000 | -1.067787000 | 1                              | -4.349952000 | -0.043083000 | -1.171637000 |
| 7                              | 1.600875000  | 1.285196000  | -0.496318000 | 7                              | -1.310379000 | -1.441112000 | -0.573550000 |
| 6                              | 2.882488000  | 0.918813000  | -0.753592000 | 6                              | -2.640859000 | -1.268673000 | -0.830631000 |
| 6                              | 3.713595000  | 2.099220000  | -0.888870000 | 6                              | -3.316295000 | -2.544488000 | -0.887500000 |
| 1                              | 4.777793000  | 2.094012000  | -1.088458000 | 1                              | -4.375311000 | -2.672362000 | -1.072011000 |
| 6                              | 2.884672000  | 3.175423000  | -0.751047000 | 6                              | -2.364143000 | -3.496333000 | -0.681815000 |
| 1                              | 3.136357000  | 4.226326000  | -0.818575000 | 1                              | -2.475717000 | -4.572847000 | -0.666339000 |
| 6                              | 1.549905000  | 2.652899000  | -0.535426000 | 6                              | -1.112147000 | -2.801391000 | -0.510796000 |
| 6                              | 0.383576000  | 3.410650000  | -0.475208000 | 6                              | 0.115449000  | -3.425024000 | -0.377285000 |
| 1                              | 0.505462000  | 4.489650000  | -0.499075000 | 1                              | 0.125565000  | -4.509274000 | -0.333626000 |

|                               |              |              |              |                               |              |              |              |
|-------------------------------|--------------|--------------|--------------|-------------------------------|--------------|--------------|--------------|
| 7                             | 1.512023000  | -1.417274000 | -0.455915000 | 7                             | 1.436722000  | -1.536688000 | -0.572254000 |
| 6                             | 1.343590000  | -2.770856000 | -0.378617000 | 6                             | 1.138810000  | -2.867484000 | -0.503155000 |
| 6                             | 2.622769000  | -3.439413000 | -0.393865000 | 6                             | 2.365456000  | -3.631918000 | -0.455998000 |
| 1                             | 2.756159000  | -4.512013000 | -0.337773000 | 1                             | 2.419382000  | -4.711288000 | -0.393931000 |
| 6                             | 3.567043000  | -2.465853000 | -0.511474000 | 6                             | 3.393879000  | -2.734954000 | -0.503086000 |
| 1                             | 4.643286000  | -2.567903000 | -0.564034000 | 1                             | 4.457814000  | -2.933150000 | -0.481693000 |
| 6                             | 2.862045000  | -1.206672000 | -0.545895000 | 6                             | 2.799685000  | -1.418920000 | -0.564043000 |
| 6                             | 3.481248000  | 0.033791000  | -0.612704000 | 6                             | 3.502499000  | -0.211512000 | -0.540051000 |
| 1                             | 4.564346000  | 0.043894000  | -0.681626000 | 1                             | 4.585927000  | -0.282416000 | -0.534558000 |
| 16                            | 0.186222000  | 0.016030000  | -2.791832000 | 16                            | 0.171142000  | 0.082177000  | -3.169005000 |
| 1                             | 0.239979000  | -1.322591000 | -2.947152000 | 1                             | 0.230531000  | -1.262576000 | -3.252896000 |
| 6                             | 0.225284000  | 0.012133000  | 1.682941000  | 6                             | 0.351322000  | 0.034549000  | 1.792200000  |
| 17                            | -0.623003000 | -1.507131000 | 2.517764000  | 17                            | -1.122311000 | -1.586525000 | 2.747814000  |
| 17                            | -0.634723000 | 1.532283000  | 2.500157000  | 17                            | -0.169005000 | 1.593252000  | 2.650333000  |
| 17                            | 1.870216000  | 0.021913000  | 2.378076000  | 17                            | 1.886586000  | -0.447545000 | 2.492487000  |
| 8                             | -3.056129000 | -0.000763000 | 1.873142000  | 8                             | -2.939193000 | 0.372966000  | 2.050121000  |
| 1                             | -2.436979000 | 0.780007000  | 2.039557000  | 1                             | -2.296221000 | 1.116646000  | 2.093907000  |
| 1                             | -3.253441000 | -0.012778000 | 0.863712000  | 1                             | -3.179417000 | 0.279055000  | 1.092231000  |
| 1                             | -2.432813000 | -0.773947000 | 2.058234000  | 1                             | -2.282616000 | -0.523888000 | 2.344260000  |
| ${}^6\text{TS}_{\text{SE}^3}$ |              |              |              | ${}^4\text{TS}_{\text{SE}^3}$ |              |              |              |
| 26                            | 0.097196000  | 0.019786000  | -0.796916000 | 26                            | 0.096380000  | 0.017874000  | -0.451270000 |
| 7                             | 1.626807000  | 1.373690000  | -0.448277000 | 7                             | 1.588596000  | 1.435716000  | -0.386752000 |
| 6                             | 2.963899000  | 1.074265000  | -0.466541000 | 6                             | 2.931737000  | 1.192174000  | -0.464496000 |
| 6                             | 3.728447000  | 2.296304000  | -0.365014000 | 6                             | 3.647059000  | 2.452668000  | -0.452423000 |
| 1                             | 4.809521000  | 2.349498000  | -0.352260000 | 1                             | 4.724098000  | 2.551106000  | -0.499553000 |
| 6                             | 2.830456000  | 3.321894000  | -0.287612000 | 6                             | 2.709915000  | 3.439623000  | -0.385718000 |
| 1                             | 3.030008000  | 4.382417000  | -0.202596000 | 1                             | 2.862802000  | 4.511156000  | -0.368797000 |
| 6                             | 1.512313000  | 2.732099000  | -0.351880000 | 6                             | 1.414498000  | 2.789258000  | -0.362916000 |
| 6                             | 0.306733000  | 3.439696000  | -0.368373000 | 6                             | 0.182027000  | 3.449968000  | -0.385356000 |
| 1                             | 0.377401000  | 4.521344000  | -0.307199000 | 1                             | 0.220678000  | 4.535358000  | -0.389063000 |
| 7                             | -1.271723000 | 1.567508000  | -0.583690000 | 7                             | -1.347403000 | 1.529953000  | -0.503510000 |
| 6                             | -0.974501000 | 2.904812000  | -0.505002000 | 6                             | -1.086343000 | 2.875797000  | -0.502758000 |
| 6                             | -2.190717000 | 3.672723000  | -0.637352000 | 6                             | -2.315200000 | 3.599715000  | -0.732284000 |
| 1                             | -2.245771000 | 4.753429000  | -0.605187000 | 1                             | -2.400520000 | 4.678239000  | -0.774056000 |
| 6                             | -3.209268000 | 2.781349000  | -0.825435000 | 6                             | -3.299090000 | 2.668241000  | -0.920099000 |
| 1                             | -4.261743000 | 2.987579000  | -0.973254000 | 1                             | -4.345598000 | 2.835568000  | -1.141673000 |
| 6                             | -2.620131000 | 1.461953000  | -0.800440000 | 6                             | -2.673749000 | 1.371493000  | -0.797829000 |
| 6                             | -3.327254000 | 0.251680000  | -0.897551000 | 6                             | -3.319230000 | 0.128373000  | -0.928329000 |
| 1                             | -4.398651000 | 0.326374000  | -1.058413000 | 1                             | -4.379549000 | 0.154939000  | -1.162390000 |
| 7                             | -1.465468000 | -1.335123000 | -0.661846000 | 7                             | -1.404299000 | -1.385930000 | -0.620842000 |
| 6                             | -2.790367000 | -1.044130000 | -0.822333000 | 6                             | -2.725296000 | -1.142813000 | -0.860480000 |
| 6                             | -3.557216000 | -2.271552000 | -0.844176000 | 6                             | -3.432274000 | -2.401066000 | -1.017004000 |
| 1                             | -4.632638000 | -2.329045000 | -0.954419000 | 1                             | -4.494137000 | -2.494933000 | -1.205971000 |
| 6                             | -2.665648000 | -3.294154000 | -0.699916000 | 6                             | -2.503242000 | -3.388316000 | -0.896099000 |
| 1                             | -2.865475000 | -4.357541000 | -0.669949000 | 1                             | -2.647701000 | -4.458693000 | -0.967821000 |
| 6                             | -1.351438000 | -2.698286000 | -0.600121000 | 6                             | -1.223625000 | -2.740453000 | -0.676158000 |
| 6                             | -0.152742000 | -3.404275000 | -0.510454000 | 6                             | 0.001137000  | -3.403465000 | -0.613129000 |
| 1                             | -0.229106000 | -4.486076000 | -0.461424000 | 1                             | -0.036373000 | -4.488081000 | -0.650594000 |

|                                           |              |              |              |                                           |              |              |              |
|-------------------------------------------|--------------|--------------|--------------|-------------------------------------------|--------------|--------------|--------------|
| 7                                         | 1.522593000  | -1.483979000 | -0.561976000 | 7                                         | 1.344017000  | -1.572328000 | -0.494846000 |
| 6                                         | 1.276245000  | -2.825654000 | -0.577897000 | 6                                         | 1.007336000  | -2.896847000 | -0.438568000 |
| 6                                         | 2.531619000  | -3.542382000 | -0.610346000 | 6                                         | 2.194488000  | -3.717552000 | -0.446236000 |
| 1                                         | 2.630363000  | -4.620361000 | -0.626818000 | 1                                         | 2.193053000  | -4.799024000 | -0.404565000 |
| 6                                         | 3.524198000  | -2.602517000 | -0.625135000 | 6                                         | 3.253757000  | -2.867243000 | -0.532760000 |
| 1                                         | 4.594869000  | -2.760865000 | -0.652138000 | 1                                         | 4.309934000  | -3.101180000 | -0.568531000 |
| 6                                         | 2.877983000  | -1.310217000 | -0.589915000 | 6                                         | 2.711411000  | -1.529513000 | -0.553873000 |
| 6                                         | 3.524321000  | -0.070099000 | -0.552298000 | 6                                         | 3.482749000  | -0.375514000 | -0.553493000 |
| 1                                         | 4.609467000  | -0.089627000 | -0.592401000 | 1                                         | 4.560223000  | -0.498831000 | -0.593847000 |
| 16                                        | 0.082993000  | 0.181709000  | -2.884919000 | 16                                        | 0.250432000  | 0.074247000  | -2.801573000 |
| 1                                         | 1.006878000  | -0.789559000 | -3.023451000 | 1                                         | 0.039248000  | -1.242611000 | -3.002468000 |
| 6                                         | 0.344887000  | 0.052386000  | 1.724104000  | 6                                         | 0.309631000  | 0.077523000  | 1.631560000  |
| 17                                        | -1.083874000 | -1.642996000 | 2.674664000  | 17                                        | -1.240309000 | -1.511752000 | 2.583410000  |
| 17                                        | -0.236799000 | 1.534743000  | 2.574851000  | 17                                        | -0.217348000 | 1.584056000  | 2.484886000  |
| 17                                        | 1.865686000  | -0.424240000 | 2.424537000  | 17                                        | 1.775663000  | -0.476819000 | 2.395131000  |
| 8                                         | -3.031819000 | 0.190031000  | 2.002064000  | 8                                         | -3.083750000 | 0.428677000  | 1.914745000  |
| 1                                         | -2.462347000 | 0.986985000  | 1.986430000  | 1                                         | -2.474729000 | 1.194822000  | 1.960228000  |
| 1                                         | -3.283416000 | 0.041171000  | 1.052855000  | 1                                         | -3.291552000 | 0.327367000  | 0.947860000  |
| 1                                         | -2.285814000 | -0.658933000 | 2.302703000  | 1                                         | -2.387924000 | -0.465249000 | 2.211380000  |
| <sup>2</sup> Ts <sub>SE<sup>3</sup></sub> |              |              |              | <sup>6</sup> PC <sub>SE<sup>3</sup></sub> |              |              |              |
| 26                                        | 0.114673000  | 0.004200000  | -0.544115000 | 26                                        | 0.444896000  | 0.170116000  | -0.911758000 |
| 7                                         | 1.672152000  | 1.270439000  | -0.402731000 | 7                                         | 1.906064000  | -1.179436000 | -0.282919000 |
| 6                                         | 2.995788000  | 0.920572000  | -0.462389000 | 6                                         | 1.852588000  | -2.544695000 | -0.435303000 |
| 6                                         | 3.825275000  | 2.098840000  | -0.386202000 | 6                                         | 3.146158000  | -3.118010000 | -0.149096000 |
| 1                                         | 4.907306000  | 2.089055000  | -0.410744000 | 1                                         | 3.372977000  | -4.175664000 | -0.187816000 |
| 6                                         | 2.984665000  | 3.164901000  | -0.281758000 | 6                                         | 3.977243000  | -2.084588000 | 0.167876000  |
| 1                                         | 3.228957000  | 4.216696000  | -0.208699000 | 1                                         | 5.024039000  | -2.122888000 | 0.440586000  |
| 6                                         | 1.642780000  | 2.636917000  | -0.312464000 | 6                                         | 3.196946000  | -0.873577000 | 0.073925000  |
| 6                                         | 0.491152000  | 3.412731000  | -0.329401000 | 6                                         | 3.677928000  | 0.409654000  | 0.311540000  |
| 1                                         | 0.611569000  | 4.489796000  | -0.275230000 | 1                                         | 4.722683000  | 0.498082000  | 0.592477000  |
| 7                                         | -1.131810000 | 1.589685000  | -0.577288000 | 7                                         | 1.619385000  | 1.679160000  | -0.103512000 |
| 6                                         | -0.793442000 | 2.919503000  | -0.500108000 | 6                                         | 2.943703000  | 1.595511000  | 0.232556000  |
| 6                                         | -1.958945000 | 3.744063000  | -0.697083000 | 6                                         | 3.458434000  | 2.909160000  | 0.533255000  |
| 1                                         | -1.955958000 | 4.826194000  | -0.673907000 | 1                                         | 4.477968000  | 3.119552000  | 0.829680000  |
| 6                                         | -3.000517000 | 2.899732000  | -0.940430000 | 6                                         | 2.422251000  | 3.784189000  | 0.380647000  |
| 1                                         | -4.033908000 | 3.141603000  | -1.153684000 | 1                                         | 2.420779000  | 4.856620000  | 0.527203000  |
| 6                                         | -2.468485000 | 1.559911000  | -0.876169000 | 6                                         | 1.272638000  | 3.006975000  | -0.013033000 |
| 6                                         | -3.233192000 | 0.402113000  | -1.026956000 | 6                                         | -0.003289000 | 3.520303000  | -0.220998000 |
| 1                                         | -4.284279000 | 0.525230000  | -1.268937000 | 1                                         | -0.125548000 | 4.591230000  | -0.091106000 |
| 7                                         | -1.449150000 | -1.243605000 | -0.652154000 | 7                                         | -1.198558000 | 1.437283000  | -0.742661000 |
| 6                                         | -2.748198000 | -0.901358000 | -0.912958000 | 6                                         | -1.152174000 | 2.792990000  | -0.539079000 |
| 6                                         | -3.577385000 | -2.082909000 | -0.986748000 | 6                                         | -2.481930000 | 3.344830000  | -0.641097000 |
| 1                                         | -4.643002000 | -2.074924000 | -1.177108000 | 1                                         | -2.728453000 | 4.391196000  | -0.514268000 |
| 6                                         | -2.755875000 | -3.146510000 | -0.775665000 | 6                                         | -3.324597000 | 2.301203000  | -0.910395000 |
| 1                                         | -3.001901000 | -4.200232000 | -0.758437000 | 1                                         | -4.399170000 | 2.317469000  | -1.035049000 |
| 6                                         | -1.427584000 | -2.614377000 | -0.591046000 | 6                                         | -2.510091000 | 1.114593000  | -0.976654000 |
| 6                                         | -0.290288000 | -3.391600000 | -0.451685000 | 6                                         | -2.992650000 | -0.175223000 | -1.198571000 |
| 1                                         | -0.418740000 | -4.468158000 | -0.411646000 | 1                                         | -4.062893000 | -0.278376000 | -1.335092000 |

|                               |              |              |              |                               |              |              |              |
|-------------------------------|--------------|--------------|--------------|-------------------------------|--------------|--------------|--------------|
| 7                             | -0.886431000 | -1.421231000 | -0.990915000 | 7                             | -0.814656000 | -1.438614000 | -0.954820000 |
| 6                             | -2.244034000 | -1.347049000 | -1.195924000 | 6                             | -2.170716000 | -1.395758000 | -1.195871000 |
| 6                             | -2.782881000 | -2.672120000 | -1.377119000 | 6                             | -2.683911000 | -2.721329000 | -1.408096000 |
| 1                             | -3.829636000 | -2.892357000 | -1.539889000 | 1                             | -3.723574000 | -2.948439000 | -1.602729000 |
| 6                             | -1.736128000 | -3.541966000 | -1.277418000 | 6                             | -1.626938000 | -3.574086000 | -1.296441000 |
| 1                             | -1.750685000 | -4.622069000 | -1.345642000 | 1                             | -1.613140000 | -4.652636000 | -1.383342000 |
| 6                             | -0.557183000 | -2.750108000 | -1.024988000 | 6                             | -0.473419000 | -2.767011000 | -1.005571000 |
| 6                             | 0.717701000  | -3.268439000 | -0.784571000 | 6                             | 0.790539000  | -3.283390000 | -0.751811000 |
| 1                             | 0.826187000  | -4.346558000 | -0.849923000 | 1                             | 0.917456000  | -4.358218000 | -0.824326000 |
| 16                            | 0.969364000  | 0.421418000  | -3.173053000 | 16                            | 0.947234000  | 0.389363000  | -3.019861000 |
| 1                             | -0.184883000 | -0.159490000 | -3.561531000 | 1                             | -0.188675000 | -0.223802000 | -3.409627000 |
| 6                             | 0.148176000  | -0.466299000 | 1.967675000  | 6                             | 0.109937000  | -0.379932000 | 1.897396000  |
| 17                            | -4.724900000 | -0.313548000 | 1.739814000  | 17                            | -4.760901000 | -0.286107000 | 1.683728000  |
| 17                            | 1.499922000  | 0.087547000  | 2.899649000  | 17                            | 1.426414000  | 0.214290000  | 2.856207000  |
| 17                            | -0.192897000 | -2.133133000 | 2.280654000  | 17                            | -0.237772000 | -2.035522000 | 2.262912000  |
| 8                             | -2.212580000 | 1.190147000  | 2.120101000  | 8                             | -2.269918000 | 1.266977000  | 2.082048000  |
| 1                             | -1.433610000 | 0.699291000  | 1.769293000  | 1                             | -1.489828000 | 0.773464000  | 1.740585000  |
| 1                             | -2.302286000 | 1.965938000  | 1.549218000  | 1                             | -2.368781000 | 2.022437000  | 1.485425000  |
| 1                             | -3.556164000 | 0.341998000  | 1.924297000  | 1                             | -3.609553000 | 0.388779000  | 1.882928000  |
| ${}^4\text{PC}_{\text{SE}^3}$ |              |              |              | ${}^2\text{PC}_{\text{SE}^3}$ |              |              |              |
| 26                            | 0.418534000  | 0.113843000  | -0.684346000 | 26                            | 0.254243000  | 0.032107000  | -0.558556000 |
| 7                             | 1.909082000  | -1.160396000 | -0.249056000 | 7                             | 2.100017000  | 0.744551000  | -0.137711000 |
| 6                             | 1.892225000  | -2.529951000 | -0.392368000 | 6                             | 3.250891000  | -0.000894000 | -0.067971000 |
| 6                             | 3.191628000  | -3.079858000 | -0.107227000 | 6                             | 4.372876000  | 0.857458000  | 0.219253000  |
| 1                             | 3.430684000  | -4.134560000 | -0.146445000 | 1                             | 5.394612000  | 0.515127000  | 0.320867000  |
| 6                             | 4.003653000  | -2.031569000 | 0.199715000  | 6                             | 3.886628000  | 2.126675000  | 0.320586000  |
| 1                             | 5.052829000  | -2.040869000 | 0.464875000  | 1                             | 4.425982000  | 3.043801000  | 0.518756000  |
| 6                             | 3.202003000  | -0.840160000 | 0.097541000  | 6                             | 2.468322000  | 2.050130000  | 0.080569000  |
| 6                             | 3.682250000  | 0.440699000  | 0.299607000  | 6                             | 1.611391000  | 3.137739000  | 0.008458000  |
| 1                             | 4.728360000  | 0.550789000  | 0.564424000  | 1                             | 2.035900000  | 4.121748000  | 0.178301000  |
| 7                             | 1.589813000  | 1.643783000  | -0.138284000 | 7                             | -0.439914000 | 1.920747000  | -0.576145000 |
| 6                             | 2.923929000  | 1.597794000  | 0.177432000  | 6                             | 0.268219000  | 3.071934000  | -0.342896000 |
| 6                             | 3.436074000  | 2.922767000  | 0.400574000  | 6                             | -0.568295000 | 4.225418000  | -0.556991000 |
| 1                             | 4.461314000  | 3.146505000  | 0.665013000  | 1                             | -0.243772000 | 5.250290000  | -0.431485000 |
| 6                             | 2.394054000  | 3.781636000  | 0.217956000  | 6                             | -1.784509000 | 3.758411000  | -0.956336000 |
| 1                             | 2.381263000  | 4.860459000  | 0.302077000  | 1                             | -2.671401000 | 4.318426000  | -1.223636000 |
| 6                             | 1.248317000  | 2.978499000  | -0.113168000 | 6                             | -1.690944000 | 2.319328000  | -0.968866000 |
| 6                             | -0.017658000 | 3.490040000  | -0.332886000 | 6                             | -2.739575000 | 1.469368000  | -1.301102000 |
| 1                             | -0.144099000 | 4.565256000  | -0.263261000 | 1                             | -3.676903000 | 1.925925000  | -1.603664000 |
| 7                             | -1.164499000 | 1.360872000  | -0.746884000 | 7                             | -1.589683000 | -0.661039000 | -0.909422000 |
| 6                             | -1.142259000 | 2.728195000  | -0.616363000 | 6                             | -2.690342000 | 0.079885000  | -1.246172000 |
| 6                             | -2.466664000 | 3.268058000  | -0.779533000 | 6                             | -3.825855000 | -0.782593000 | -1.481190000 |
| 1                             | -2.712730000 | 4.320078000  | -0.716130000 | 1                             | -4.813724000 | -0.435982000 | -1.756221000 |
| 6                             | -3.294756000 | 2.209333000  | -1.021348000 | 6                             | -3.394234000 | -2.056358000 | -1.278024000 |
| 1                             | -4.364108000 | 2.205294000  | -1.184359000 | 1                             | -3.950003000 | -2.981668000 | -1.352925000 |
| 6                             | -2.471470000 | 1.031618000  | -1.009556000 | 6                             | -1.993041000 | -1.970036000 | -0.944664000 |
| 6                             | -2.948928000 | -0.252798000 | -1.220112000 | 6                             | -1.164802000 | -3.069991000 | -0.777041000 |
| 1                             | -4.012817000 | -0.371621000 | -1.385046000 | 1                             | -1.620643000 | -4.053174000 | -0.826169000 |

|    |              |              |              |    |              |              |              |
|----|--------------|--------------|--------------|----|--------------|--------------|--------------|
| 7  | 0.940281000  | -1.849362000 | -0.536312000 | 6  | 0.246415000  | -2.721799000 | 0.681492000  |
| 6  | 0.212249000  | -3.005254000 | -0.624975000 | 6  | -0.896766000 | -3.405961000 | 0.309572000  |
| 6  | 1.088450000  | -4.150902000 | -0.589037000 | 1  | -0.859095000 | -4.490694000 | 0.346550000  |
| 1  | 0.755866000  | -5.179337000 | -0.643392000 | 7  | -2.335065000 | -1.486690000 | -0.185792000 |
| 6  | 2.357431000  | -3.667589000 | -0.491474000 | 6  | -2.092897000 | -2.826377000 | -0.103068000 |
| 1  | 3.289449000  | -4.215536000 | -0.440597000 | 6  | -3.260786000 | -3.570880000 | -0.504771000 |
| 6  | 2.251864000  | -2.228834000 | -0.444773000 | 1  | -3.322725000 | -4.651875000 | -0.526041000 |
| 6  | 3.328338000  | -1.375855000 | -0.233418000 | 6  | -4.213049000 | -2.652748000 | -0.836026000 |
| 1  | 4.311915000  | -1.828390000 | -0.160114000 | 1  | -5.223785000 | -2.818756000 | -1.187825000 |
| 16 | 0.693476000  | 0.163664000  | -2.771795000 | 6  | -3.620938000 | -1.353578000 | -0.632202000 |
| 1  | -0.042644000 | -0.904705000 | -3.139614000 | 6  | -4.278750000 | -0.148834000 | -0.846186000 |
| 6  | 0.312332000  | 0.000954000  | 1.471686000  | 1  | -5.304457000 | -0.197513000 | -1.199407000 |
| 17 | -2.579174000 | -1.492225000 | 2.612358000  | 16 | -1.845854000 | -0.016069000 | 2.654142000  |
| 17 | -0.046515000 | 1.392944000  | 2.447942000  | 1  | -3.128969000 | -0.110377000 | 2.249560000  |
| 17 | 1.135489000  | -1.175103000 | 2.402845000  | 6  | 3.785099000  | 0.024615000  | -0.652148000 |
| 8  | -3.376496000 | 1.263532000  | 1.747084000  | 17 | 3.046107000  | -1.002496000 | -1.845289000 |
| 1  | -2.582689000 | 1.796944000  | 1.893068000  | 17 | -0.428270000 | 0.027709000  | -2.221011000 |
| 1  | -3.413234000 | 1.179503000  | 0.779600000  | 17 | 5.257717000  | -0.698894000 | 0.091853000  |
| 1  | -2.978554000 | -0.268356000 | 2.251682000  | 17 | 4.084051000  | 1.674161000  | -1.213296000 |

<sup>3</sup>TS<sub>C-inact</sub>

**Suicidal inactivation of P450 by CCl<sub>4</sub> via covalent binding to the *meso*-carbon of haem moiety**

<sup>5</sup>TS<sub>C-inact</sub>

|    |              |              |              |    |              |              |              |
|----|--------------|--------------|--------------|----|--------------|--------------|--------------|
| 26 | -1.023883000 | 0.002152000  | 0.218729000  | 26 | -1.021584000 | 0.000175000  | 0.272871000  |
| 7  | -2.464465000 | 1.364580000  | -0.202281000 | 7  | -2.393789000 | 1.396056000  | -0.212205000 |
| 6  | -3.733625000 | 1.112518000  | -0.643071000 | 6  | -3.647173000 | 1.199393000  | -0.720581000 |
| 6  | -4.440762000 | 2.351753000  | -0.858402000 | 6  | -4.305349000 | 2.465521000  | -0.937410000 |
| 1  | -5.463148000 | 2.422840000  | -1.208539000 | 1  | -5.306046000 | 2.578268000  | -1.336253000 |
| 6  | -3.573839000 | 3.354637000  | -0.540960000 | 6  | -3.426038000 | 3.430183000  | -0.545156000 |
| 1  | -3.732135000 | 4.425461000  | -0.574085000 | 1  | -3.548604000 | 4.506347000  | -0.554937000 |
| 6  | -2.342206000 | 2.721544000  | -0.135873000 | 6  | -2.235198000 | 2.746006000  | -0.099211000 |
| 6  | -1.200685000 | 3.407893000  | 0.263088000  | 6  | -1.091316000 | 3.391688000  | 0.362375000  |
| 1  | -1.256942000 | 4.492174000  | 0.286675000  | 1  | -1.123324000 | 4.476699000  | 0.407400000  |
| 7  | 0.274170000  | 1.482261000  | 0.651134000  | 7  | 0.328015000  | 1.428731000  | 0.739991000  |
| 6  | 0.001796000  | 2.829683000  | 0.633827000  | 6  | 0.090384000  | 2.780124000  | 0.744946000  |
| 6  | 1.155122000  | 3.571651000  | 1.071074000  | 6  | 1.266349000  | 3.489790000  | 1.189041000  |
| 1  | 1.199160000  | 4.651146000  | 1.143464000  | 1  | 1.337317000  | 4.566935000  | 1.276764000  |
| 6  | 2.123660000  | 2.654348000  | 1.357116000  | 6  | 2.215248000  | 2.545685000  | 1.444212000  |
| 1  | 3.135934000  | 2.818313000  | 1.702304000  | 1  | 3.237433000  | 2.676806000  | 1.775408000  |
| 6  | 1.557324000  | 1.359714000  | 1.086086000  | 6  | 1.608193000  | 1.269637000  | 1.157215000  |
| 6  | 2.252537000  | 0.152378000  | 1.256588000  | 6  | 2.273800000  | 0.039826000  | 1.282824000  |
| 1  | 3.198348000  | 0.202642000  | 1.781165000  | 1  | 3.239168000  | 0.053109000  | 1.773295000  |
| 7  | 0.400569000  | -1.354131000 | 0.680436000  | 7  | 0.359892000  | -1.395403000 | 0.750672000  |
| 6  | 1.659622000  | -1.115301000 | 1.129713000  | 6  | 1.633772000  | -1.205179000 | 1.172391000  |
| 6  | 2.336573000  | -2.350855000 | 1.425577000  | 6  | 2.268679000  | -2.465009000 | 1.471078000  |
| 1  | 3.357192000  | -2.417793000 | 1.777495000  | 1  | 3.292882000  | -2.570092000 | 1.805304000  |
| 6  | 1.456288000  | -3.352960000 | 1.140933000  | 6  | 1.342626000  | -3.431918000 | 1.218023000  |
| 1  | 1.594676000  | -4.423379000 | 1.228461000  | 1  | 1.437847000  | -4.506603000 | 1.312665000  |
|    |              |              |              | 6  | 0.152527000  | -2.752166000 | 0.764494000  |
|    |              |              |              | 6  | -1.013092000 | -3.392586000 | 0.381452000  |
|    |              |              |              | 1  | -1.020259000 | -4.477790000 | 0.431957000  |





|                                    |              |              |              |                                    |              |              |              |
|------------------------------------|--------------|--------------|--------------|------------------------------------|--------------|--------------|--------------|
| 6                                  | -3.533245000 | -1.243623000 | -0.660730000 | 16                                 | -1.411859000 | -0.001799000 | -2.424672000 |
| 6                                  | -4.112958000 | -0.008837000 | -0.939547000 | 1                                  | -2.752920000 | 0.020275000  | -2.286485000 |
| 1                                  | -5.118377000 | -0.010667000 | -1.348179000 | 6                                  | 3.492274000  | 0.000393000  | 0.564902000  |
| 16                                 | -1.497852000 | 0.003714000  | 2.678095000  | 17                                 | 2.540191000  | -0.002276000 | 2.045558000  |
| 1                                  | -2.818326000 | -0.039952000 | 2.406897000  | 17                                 | -0.695033000 | -0.004483000 | 2.207301000  |
| 6                                  | 3.406454000  | -0.001966000 | -0.632933000 | 17                                 | 4.611018000  | 1.457234000  | 0.553047000  |
| 17                                 | 2.318237000  | -0.012839000 | -2.013923000 | 17                                 | 4.615749000  | -1.452546000 | 0.551020000  |
| 17                                 | -0.798697000 | 0.014280000  | -2.469849000 |                                    |              |              |              |
| 17                                 | 4.519931000  | -1.461349000 | -0.681737000 | <sup>1</sup> PC <sub>C-inact</sub> |              |              |              |
| 17                                 | 4.517390000  | 1.458294000  | -0.704115000 | 26                                 | -0.971840000 | 0.047365000  | 0.136257000  |
|                                    |              |              |              | 7                                  | -2.330369000 | 1.428381000  | -0.141990000 |
| <sup>3</sup> PC <sub>C-inact</sub> |              |              |              | 6                                  | -3.613596000 | 1.258814000  | -0.616571000 |
| 26                                 | -0.965943000 | 0.000238000  | -0.149975000 | 6                                  | -4.283395000 | 2.532577000  | -0.734008000 |
| 7                                  | -2.381031000 | -1.400121000 | 0.134683000  | 1                                  | -5.298168000 | 2.665316000  | -1.088333000 |
| 6                                  | -3.656222000 | -1.232360000 | 0.589391000  | 6                                  | -3.400847000 | 3.472467000  | -0.293601000 |
| 6                                  | -4.316923000 | -2.508346000 | 0.710412000  | 1                                  | -3.532154000 | 4.545025000  | -0.218007000 |
| 1                                  | -5.335545000 | -2.643641000 | 1.052566000  | 6                                  | -2.192781000 | 2.763797000  | 0.061530000  |
| 6                                  | -3.418416000 | -3.450977000 | 0.300942000  | 6                                  | -1.026664000 | 3.371535000  | 0.545702000  |
| 1                                  | -3.541188000 | -4.525588000 | 0.241767000  | 1                                  | -1.085795000 | 4.439021000  | 0.746164000  |
| 6                                  | -2.212147000 | -2.745393000 | -0.046914000 | 7                                  | 0.479884000  | 1.432034000  | 0.500828000  |
| 6                                  | -1.048084000 | -3.349048000 | -0.503642000 | 6                                  | 0.188906000  | 2.772917000  | 0.770445000  |
| 1                                  | -1.092991000 | -4.421681000 | -0.675238000 | 6                                  | 1.341570000  | 3.436671000  | 1.307757000  |
| 7                                  | 0.475152000  | -1.404666000 | -0.506520000 | 1                                  | 1.376623000  | 4.476271000  | 1.608077000  |
| 6                                  | 0.169758000  | -2.737862000 | -0.758375000 | 6                                  | 2.327879000  | 2.493817000  | 1.363440000  |
| 6                                  | 1.304168000  | -3.406840000 | -1.304309000 | 1                                  | 3.345446000  | 2.601032000  | 1.711416000  |
| 1                                  | 1.329659000  | -4.451558000 | -1.588151000 | 6                                  | 1.759984000  | 1.279633000  | 0.835875000  |
| 6                                  | 2.303607000  | -2.467840000 | -1.388261000 | 6                                  | 2.552630000  | 0.007551000  | 0.719339000  |
| 1                                  | 3.316309000  | -2.589675000 | -1.744962000 | 1                                  | 3.284136000  | 0.009067000  | 1.536615000  |
| 6                                  | 1.763501000  | -1.257954000 | -0.861974000 | 7                                  | 0.472931000  | -1.390588000 | 0.523334000  |
| 6                                  | 2.567163000  | -0.000351000 | -0.733073000 | 6                                  | 1.749641000  | -1.257090000 | 0.852251000  |
| 1                                  | 3.304764000  | -0.000007000 | -1.544093000 | 6                                  | 2.302649000  | -2.476970000 | 1.394808000  |
| 7                                  | 0.475311000  | 1.404542000  | -0.504872000 | 1                                  | 3.317785000  | -2.595401000 | 1.745613000  |
| 6                                  | 1.763008000  | 1.256846000  | -0.862327000 | 6                                  | 1.302909000  | -3.401849000 | 1.344782000  |
| 6                                  | 2.302790000  | 2.465648000  | -1.391176000 | 1                                  | 1.322156000  | -4.440038000 | 1.651632000  |
| 1                                  | 3.315161000  | 2.586259000  | -1.749189000 | 6                                  | 0.156774000  | -2.726151000 | 0.796600000  |
| 6                                  | 1.303942000  | 3.405223000  | -1.307109000 | 6                                  | -1.048329000 | -3.328407000 | 0.536576000  |
| 1                                  | 1.329442000  | 4.449413000  | -1.592855000 | 1                                  | -1.101058000 | -4.399002000 | 0.722386000  |
| 6                                  | 0.170229000  | 2.737636000  | -0.758107000 | 7                                  | -2.374910000 | -1.386477000 | -0.111103000 |
| 6                                  | -1.047057000 | 3.349972000  | -0.503560000 | 6                                  | -2.222459000 | -2.722748000 | 0.063317000  |
| 1                                  | -1.091596000 | 4.422310000  | -0.676965000 | 6                                  | -3.424445000 | -3.431887000 | -0.299982000 |
| 7                                  | -2.380149000 | 1.401770000  | 0.135368000  | 1                                  | -3.551714000 | -4.506141000 | -0.244177000 |
| 6                                  | -2.211232000 | 2.746971000  | -0.046214000 | 6                                  | -4.315032000 | -2.484949000 | -0.721264000 |
| 6                                  | -3.416745000 | 3.452914000  | 0.303514000  | 1                                  | -5.329172000 | -2.617217000 | -1.077806000 |
| 1                                  | -3.539087000 | 4.527604000  | 0.244836000  | 6                                  | -3.643529000 | -1.216479000 | -0.589477000 |
| 6                                  | -4.314914000 | 2.510456000  | 0.714246000  | 6                                  | -4.209098000 | 0.030135000  | -0.847910000 |
| 1                                  | -5.333034000 | 2.646013000  | 1.057816000  | 1                                  | -5.232671000 | 0.041205000  | -1.214903000 |
| 6                                  | -3.654958000 | 1.234223000  | 0.591651000  | 16                                 | -1.368868000 | -0.069853000 | 2.499619000  |
| 6                                  | -4.255626000 | 0.001028000  | 0.837091000  | 1                                  | -2.707965000 | -0.206589000 | 2.408783000  |
| 1                                  | -5.281095000 | 0.001366000  | 1.194060000  | 6                                  | 3.464498000  | -0.007389000 | -0.578588000 |

|    |              |              |              |
|----|--------------|--------------|--------------|
| 17 | 2.488385000  | -0.014030000 | -2.040152000 |
| 17 | -0.721835000 | -0.127144000 | -2.259950000 |
| 17 | 4.579667000  | -1.468418000 | -0.565435000 |
| 17 | 4.596484000  | 1.438662000  | -0.586677000 |
